# Supplementary material for: Ionic Liquid-Assisted Fabrication of Bioactive Heterogeneous Magnetic Nanocatalyst with Antioxidant and Antibacterial Activities for the Synthesis of Polyhydroquinoline Derivatives
Source: MDPI journal article supplement (doi:10.3390/molecules27051748), 2022-03-07
Supplement: s1 [file s1]

# Ionic Liquid-assisted Fabrication of Bioactive Heterogeneous Magnetic Nanocatalyst with Antioxidant and Antibacterial Activities for the Synthesis of Polyhydroquinoline Derivatives

Shefa Mirani Nezhad<sup>1</sup>, Ehsan Nazarzadeh Zare<sup>1\*</sup>, Azimeh Davarpanah<sup>1</sup>, Seied Ali Pourmousavi<sup>1</sup>, Milad Ashrafizadeh<sup>2</sup>, Alan Prem Kumar<sup>3,4</sup>

<sup>1</sup> School of Chemistry, Damghan University, Damghan 36716-41167, Iran; shefamirani@yahoo.com (S.M.N.); a.d.13962017@gmail.com (A.D.); pourmousavi@du.ac.ir (S.A.P.)

<sup>2</sup> Faculty of Engineering and Natural Sciences, Sabanci University, Orta Mahalle, Üniversite Caddesi No. 27, Orhanlı, Tuzla 34956, Istanbul, Turkey; dvm.milad1994@gmail.com

<sup>3</sup> Cancer Science Institute of Singapore and Department of Pharmacology, Yong Loo Lin School of Medicine, National University of Singapore, Singapore 117599, Singapore; apkumar@nus.edu.sg

<sup>4</sup> NUS Centre for Cancer Research (N2CR), Yong Loo Lin School of Medicine, National University of Singapore, Singapore 117599, Singapore

\* Correspondence: ehsan.nazarzadehzare@gmail.com or e.nazarzadeh@du.ac.ir

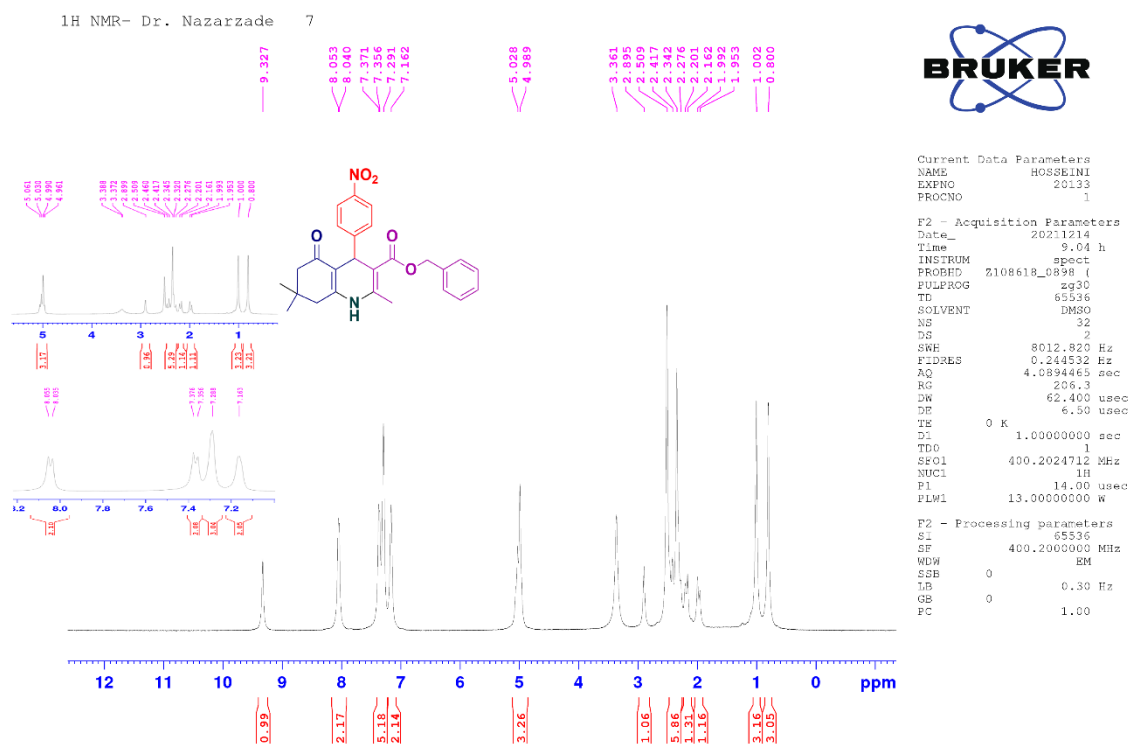

**Figure S1.** <sup>1</sup>H-NMR spectra of benzyl 2,7,7-trimethyl-4-(4-nitrophenyl)-5-oxo-1,4,5,6,7,8-hexahydroquinoline-3-carboxylate (Table 5, Entry2)

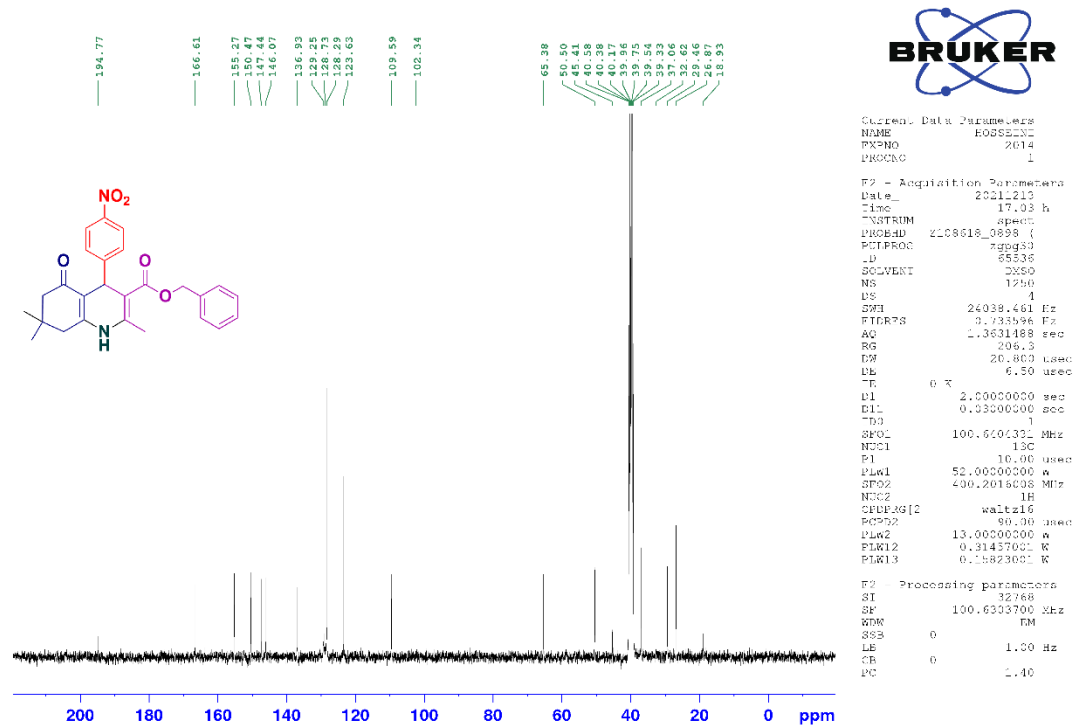

**Figure S2.** <sup>13</sup>C-NMR spectra of benzyl 2,7,7-trimethyl-4-(4-nitrophenyl)-5-oxo-1,4,5,6,7,8-hexahydroquinoline-3-carboxylate (Table 5, Entry 2)

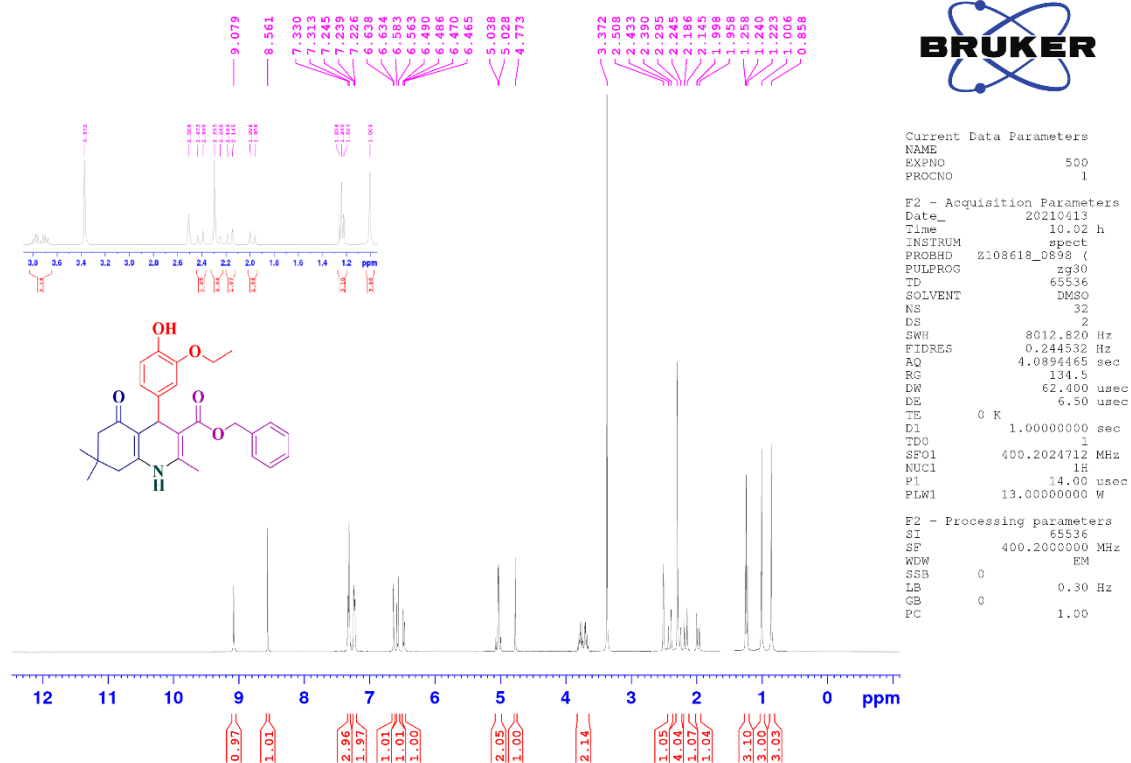

**Figure S3.** <sup>1</sup>H-NMR spectra of Benzyl4-(3-ethoxy-4-hydroxyphenyl)-2,7,7-trimethyl-5-oxo-1,4,5,6,7,8-hexahydroquinoline-3-carboxylate (**Table 5, Entry3**)

<sup>13</sup>C NMR- Dr. Pour Mousavi P5

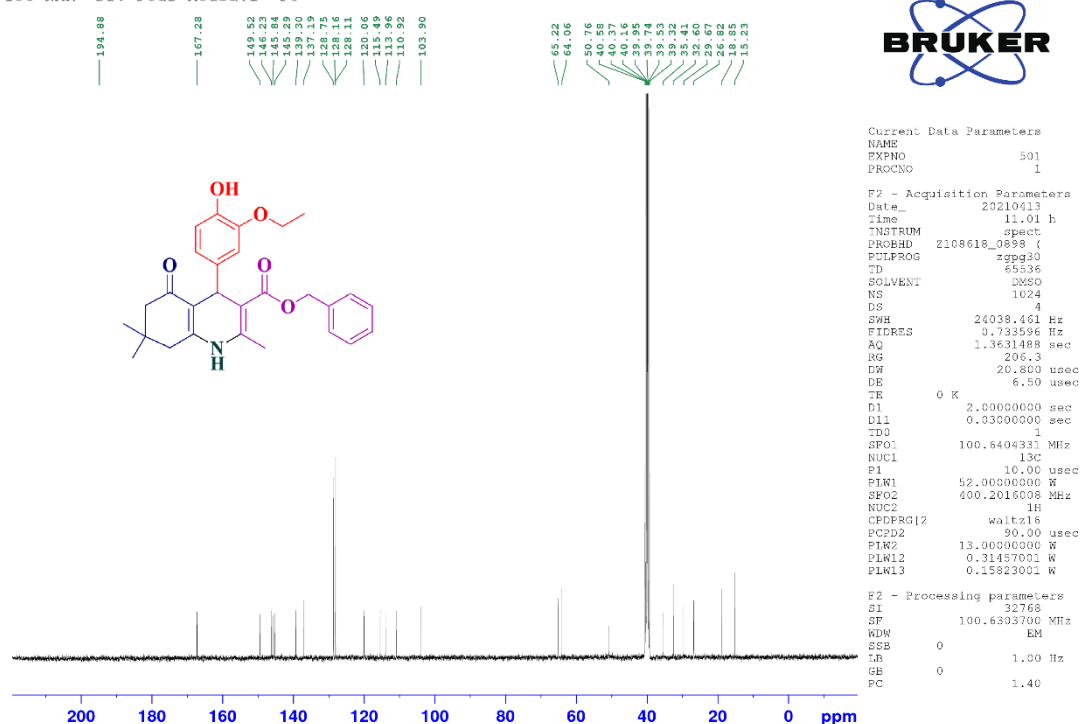

**Figure S4.** <sup>13</sup>C-NMR spectra of Benzyl4-(3-ethoxy-4-hydroxyphenyl)-2,7,7-trimethyl-5-oxo-1,4,5,6,7,8-hexahydroquino line -3-carboxylate (**Table 5, Entry3**)

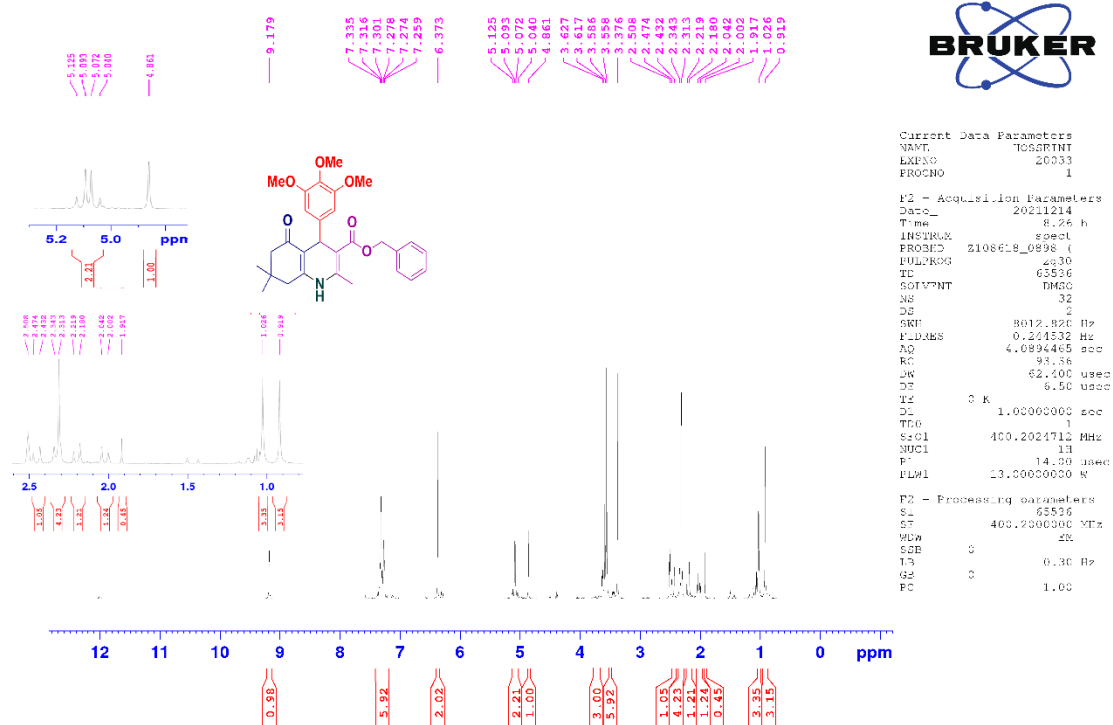

**Figure S5.** <sup>1</sup>H-NMR spectra of benzyl 2,7,7-trimethyl-5-oxo-4-(3,4,5-trimethoxyphenyl)-1,4,5,6,7,8-hexahydroquinoline-3-carboxylate (**Table 5, Entry 5**)

<sup>13</sup>C NMR- Dr. Nazarzade 2

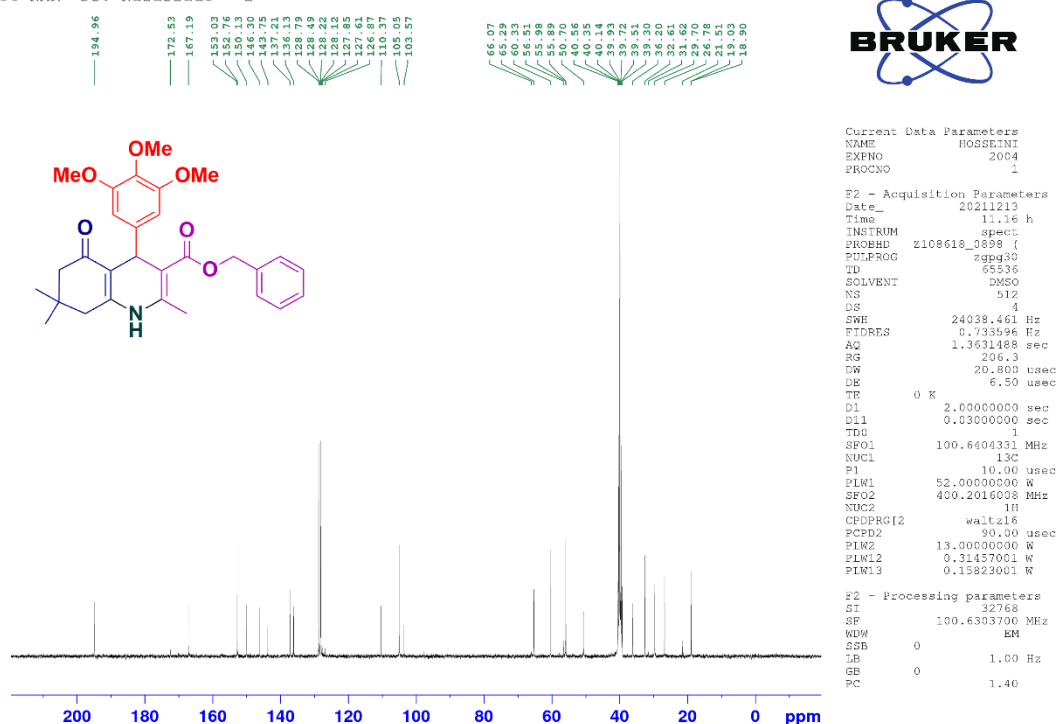

**Figure S6.** <sup>13</sup>C-NMR spectra of benzyl 2,7,7-trimethyl-5-oxo-4-(3,4,5-trimethoxyphenyl)-1,4,5,6,7,8-hexahydroquinoline-3-carboxylate (**Table 5, Entry 5**)

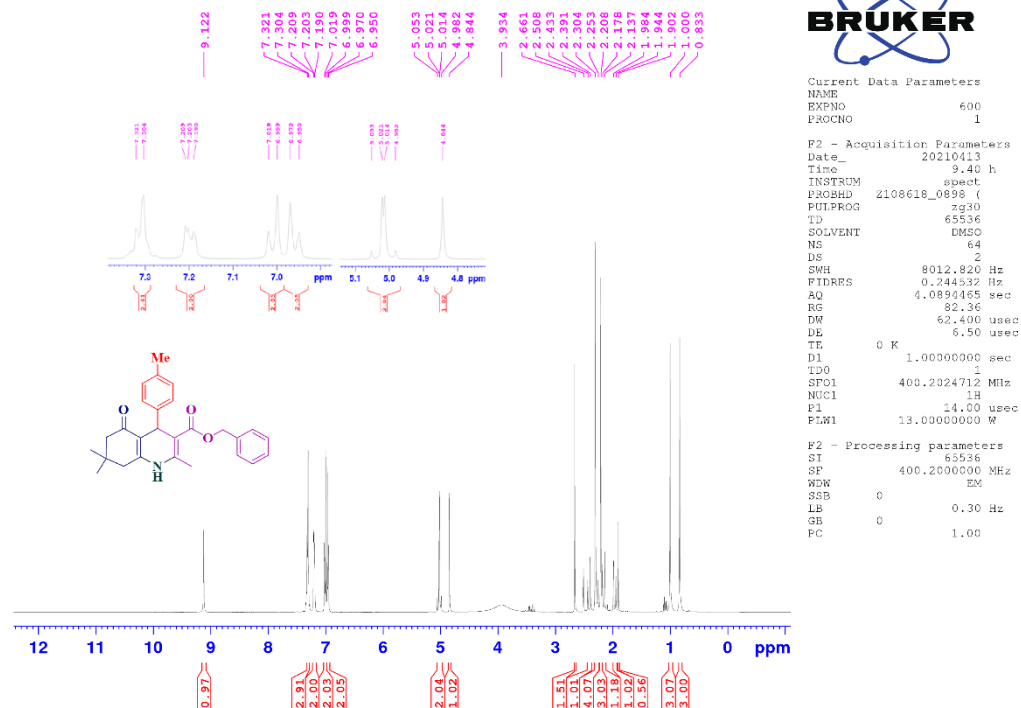

**Figure S7.** <sup>1</sup>H-NMR spectra of Benzyl 2,7,7-trimethyl-5-oxo-4-(p-tolyl)-1,4,5,6,7,8-hexahydroquinoline-3-carboxylate (Table 5, Entry 9).



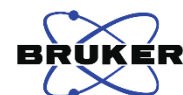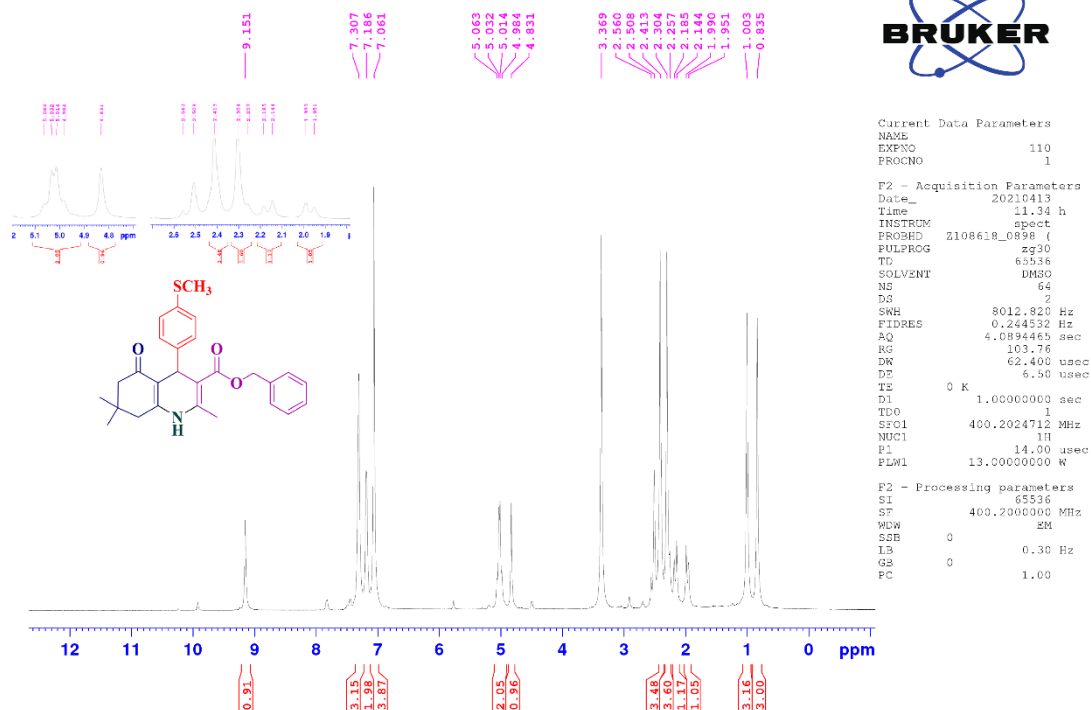

**Figure S9.** <sup>1</sup>H-NMR spectra of Benzyl 2,7,7-trimethyl-4-(4-(methylthio)phenyl)-5-oxo-1,4,5,6,7,8-hexahydroquinoline-3-carboxylate (Table 5, Entry10)

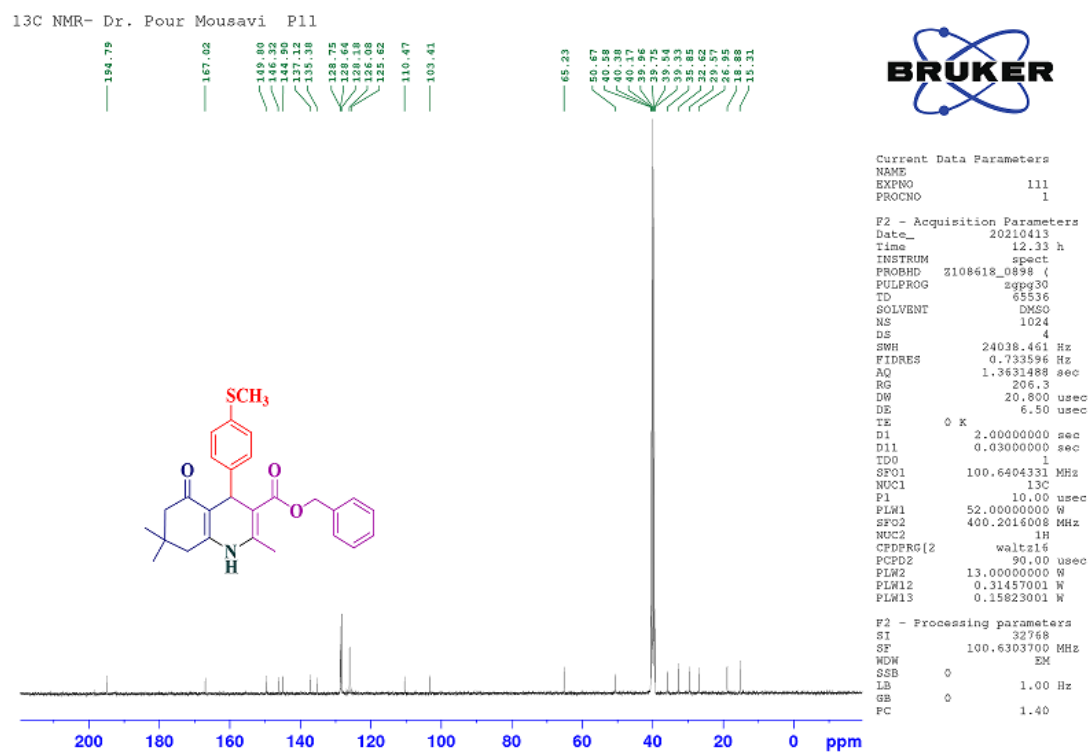

**Figure S10.** <sup>13</sup>C-NMR spectra of Benzyl 2,7,7-trimethyl-4-(4-(methylthio)phenyl)-5-oxo-1,4,5,6,7,8-hexahydroquinoline-3-carboxylate (**Table 5, Entry10**)

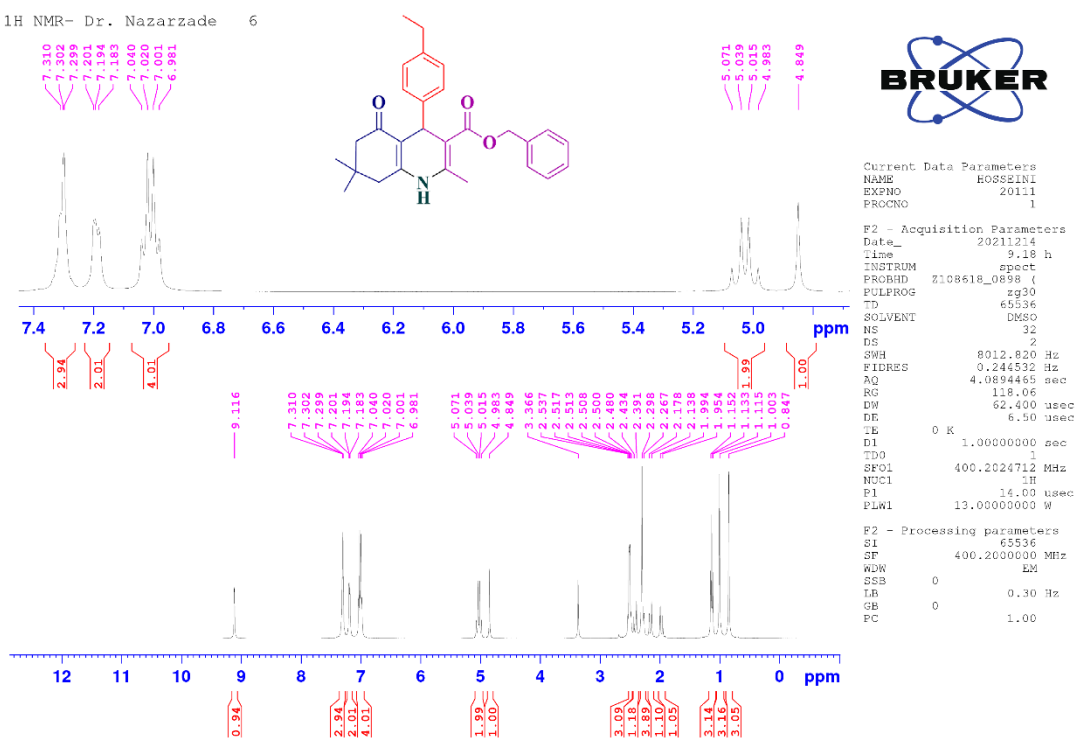

**Figure S11.** <sup>1</sup>H-NMR spectra of benzyl 4-(4-ethylphenyl)-2,7,7-trimethyl-5-oxo-1,4,5,6,7,8-hexahydroquinoline-3-carboxylate (Table 5, Entry 13)



<sup>1</sup>H NMR- P7

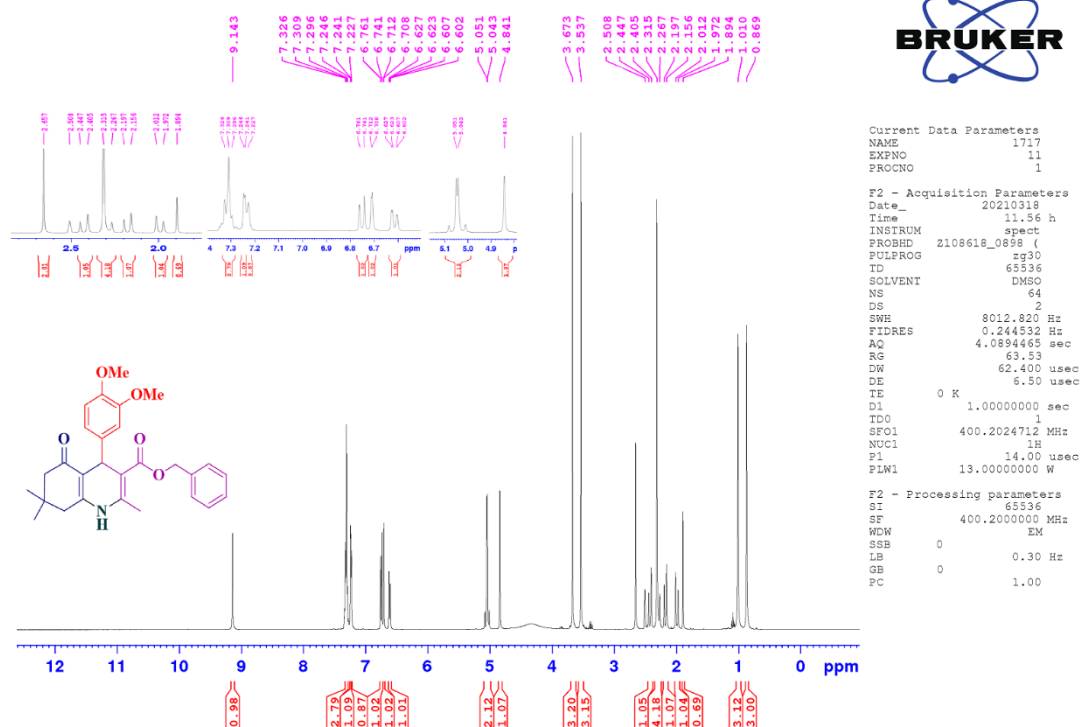

**Figure S13.** <sup>1</sup>H-NMR spectra of Benzyl 4-(3,4-dimethoxyphenyl)-2,7,7-trimethyl-5-oxo-1,4,5,6,7,8-hexahydroquinoline-3-carboxylate (**Table 5, Entry15**)

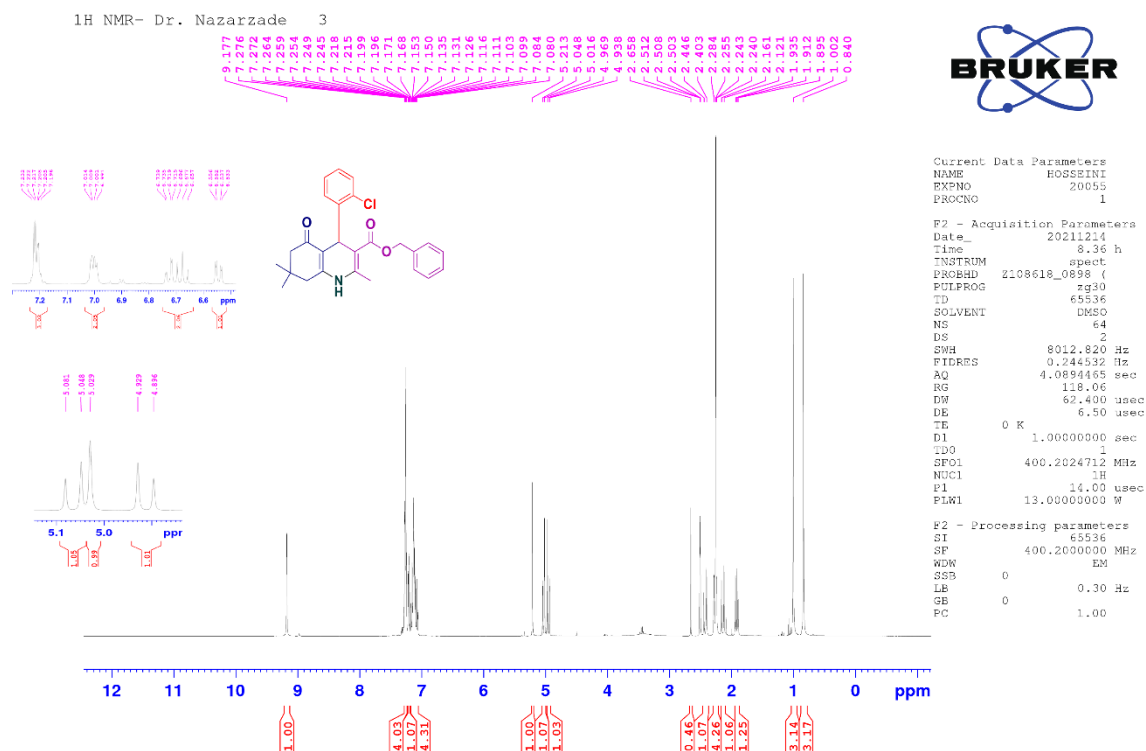

**Figure S14.** <sup>1</sup>H-NMR spectra of benzyl 4-(2-chlorophenyl)-2,7,7-trimethyl-5-oxo-1,4,5,6,7,8-hexahydroquinoline-3-carboxylate (**Table 5, Entry 18**)

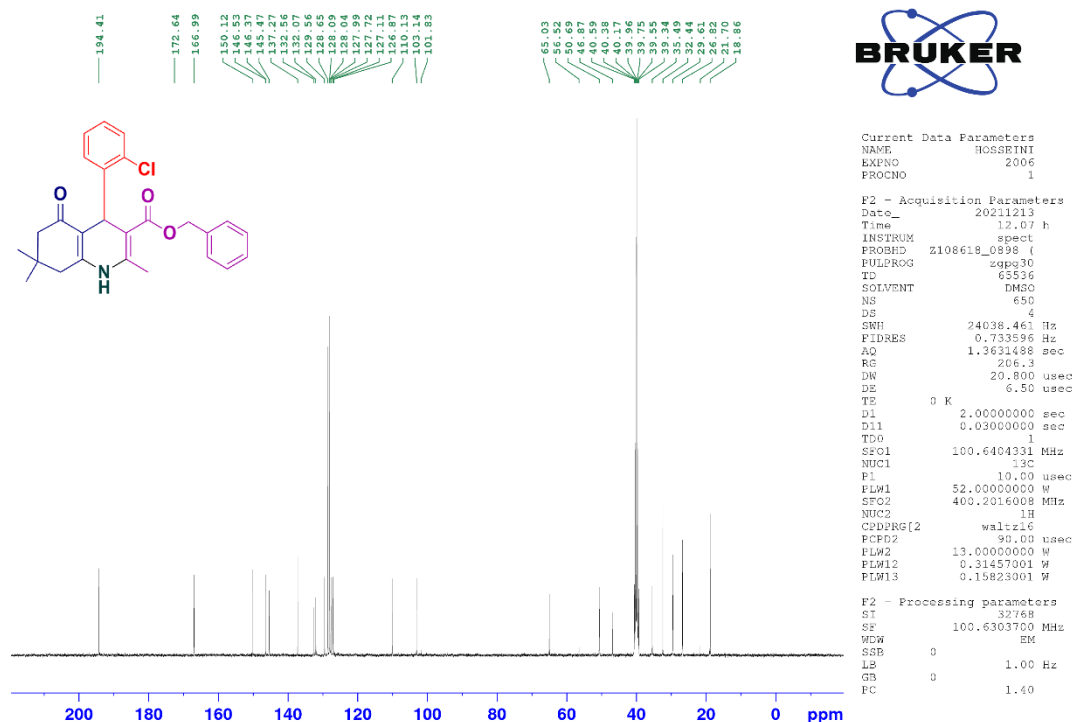

**Figure S15.** <sup>13</sup>C-NMR spectra of benzyl 4-(2-chlorophenyl)-2,7,7-trimethyl-5-oxo-1,4,5,6,7,8-hexahydroquinoline-3-carboxylate (**Table 5, Entry 18**)

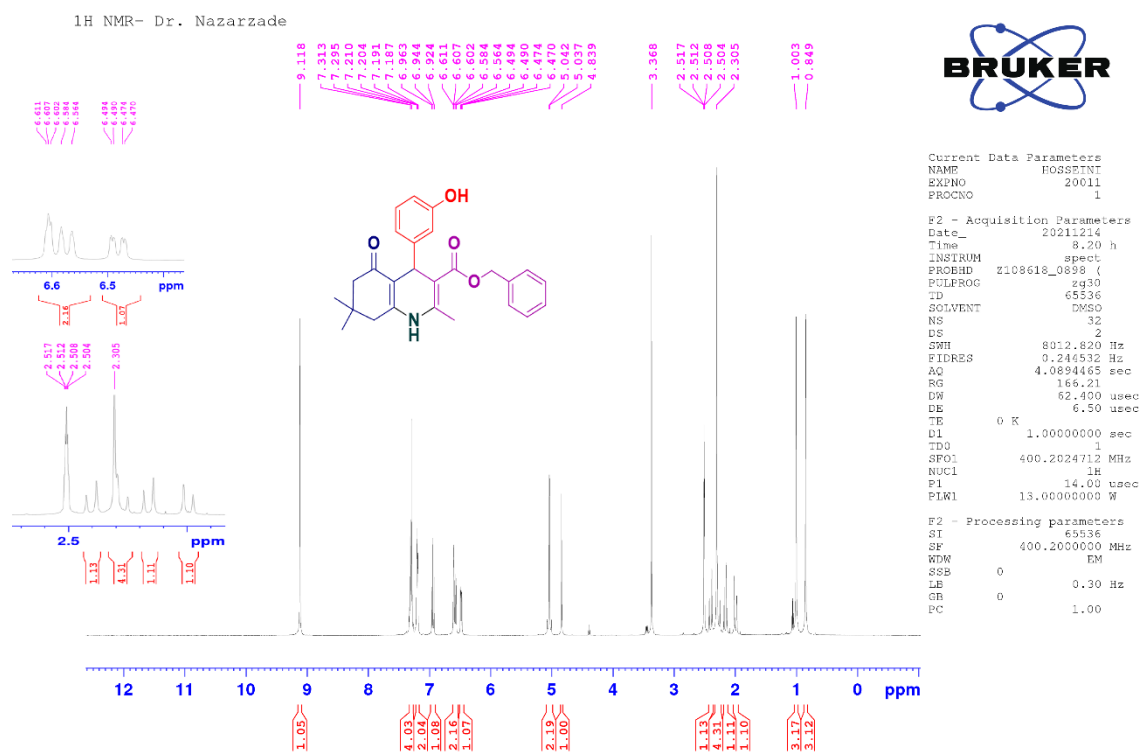

**Figure S16.** <sup>1</sup>H-NMR spectra of benzyl 4-(3-hydroxyphenyl)-2,7,7-trimethyl-5-oxo-1,4,5,6,7,8-hexahydroquinoline-3-carboxylate (**Table 5, Entry 19**)



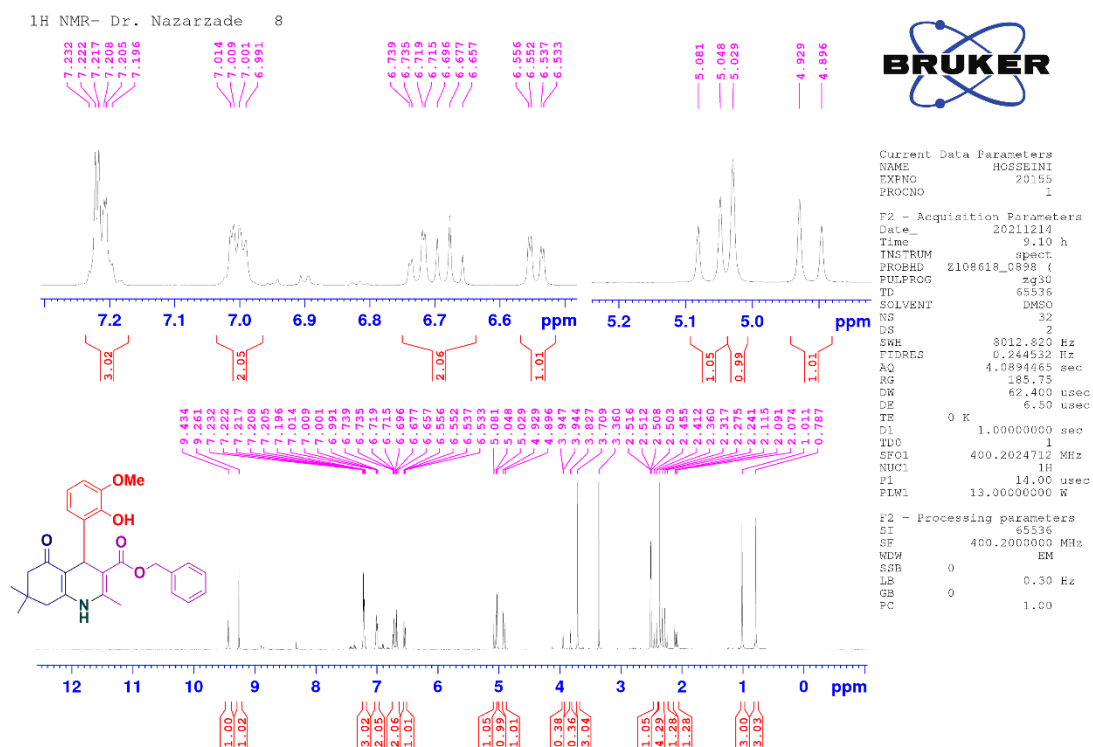

**Figure S18.** <sup>1</sup>H-NMR spectra of benzyl 4-(2-hydroxy-3-methoxyphenyl)-2,7,7-trimethyl-5-oxo-1,4,5,6,7,8-hexahydroquinoline-3-carboxylate (Table 5, Entry 20)

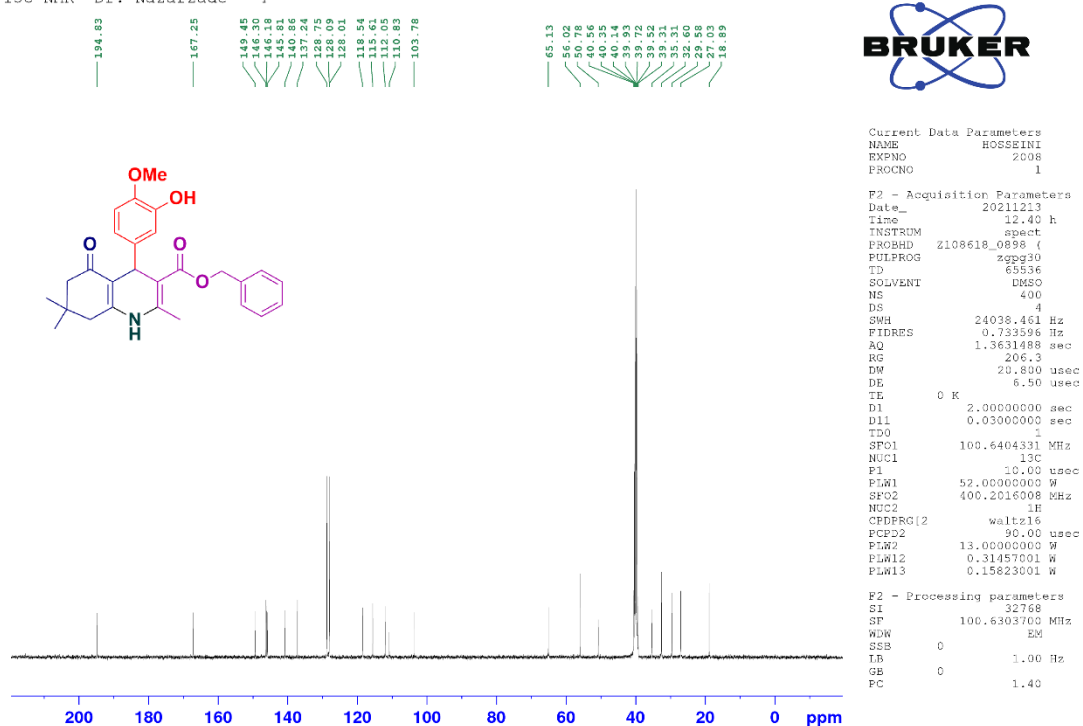

**Figure S19.** <sup>13</sup>C-NMR spectra of benzyl 4-(3-hydroxy-4-methoxyphenyl)-2,7,7-trimethyl-5-oxo-1,4,5,6,7,8-hexahydroquinoline-3-carboxylate (Table 5, Entry 20)

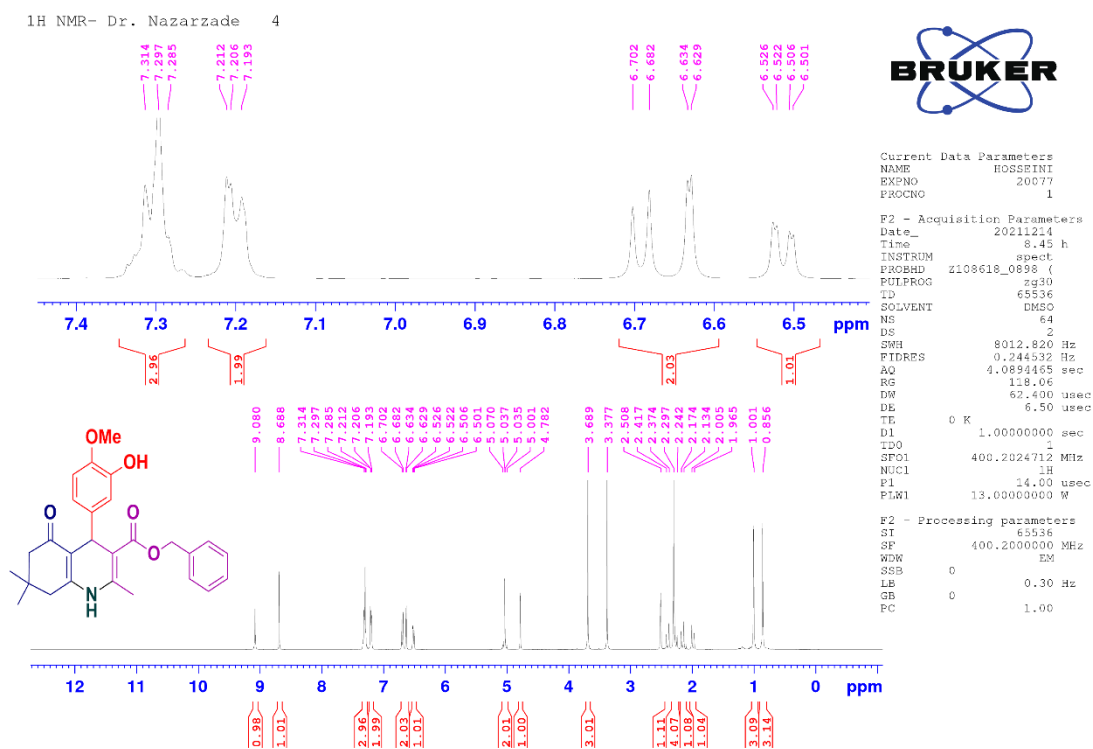

**Figure S20.** <sup>1</sup>H-NMR spectra of benzyl 4-(3-hydroxy-4-methoxyphenyl)-2,7,7-trimethyl-5-oxo-1,4,5,6,7,8-hexahydroquinoline-3-carboxylate (Table 5, Entry 22)

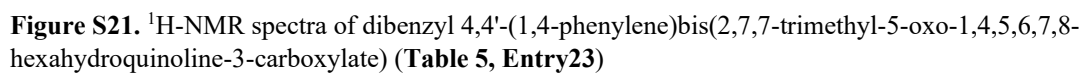

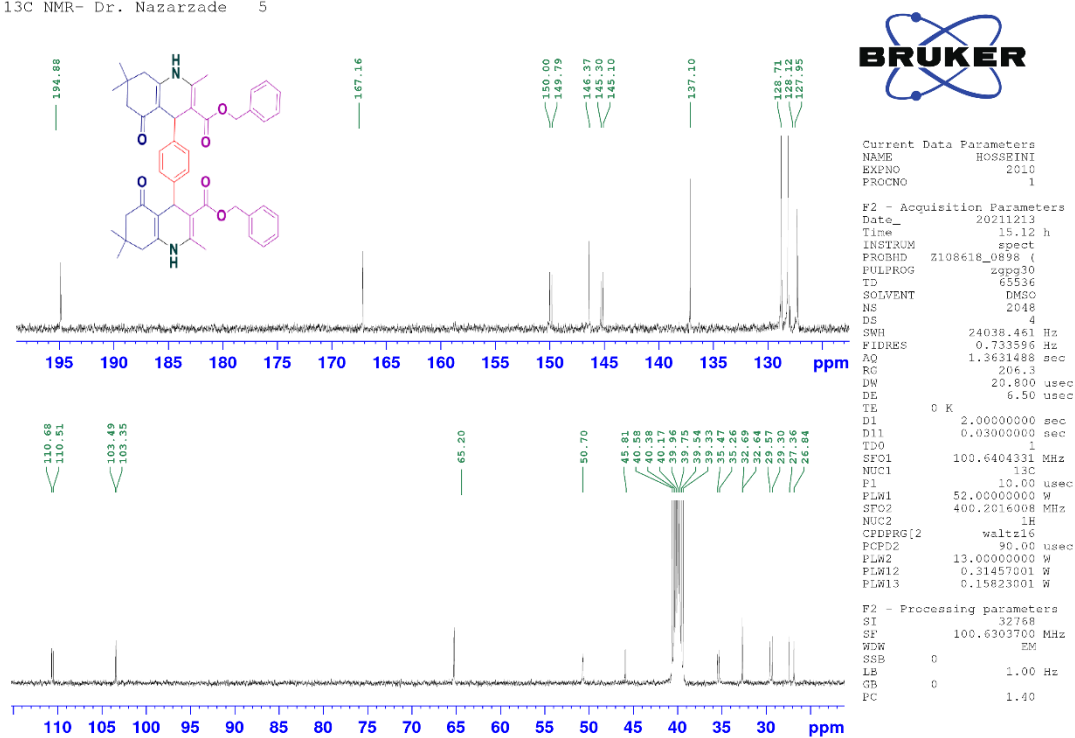

**Figure S22.**  $^{13}\text{C}$ -NMR spectra of dibenzyl 4,4'-(1,4-phenylene)bis(2,7,7-trimethyl-5-oxo-1,4,5,6,7,8-hexahydroquinoline-3-carboxylate) (Table 5, Entry 23)

Chemical structure of compound 10 is shown in the top left. The <sup>1</sup>H NMR spectrum (CDCl<sub>3</sub>) shows peaks from 0 to 10 ppm. Integration values are provided below the baseline, and peak lists with chemical shifts are on the right.

Integration values (from left to right): 0.77, 2.84, 2.02, 2.11, 1.08, 1.02, 0.84, 1.84, 2.05, 1.09, 4.48, 1.13, 2.29, 2.40, 3.13, 3.00.

Peak lists (from left to right):

- 8.992
- 7.298, 7.185, 7.112, 7.086, 7.057, 7.026, 6.840, 6.815, 6.735, 6.711, 6.688
- 5.084, 5.028, 4.986, 4.965, 4.922
- 3.904, 3.880, 3.776, 3.371
- 2.525, 2.446, 2.390, 2.345, 2.245, 2.159, 2.103, 1.927, 1.873, 1.723, 1.498, 1.005, 0.842

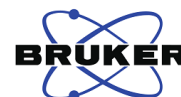

```

Current Data Parameters
NAME                H. Sh
EXPNO                43
PROCNO               1

F2 - Acquisition Parameters
Date_                20200924
Time                 16.30
INSTRUM              spect
PROBHD               5 mm PABBO BB-
PULPROG              zg30
FULPROG              TD
SOLVENT              DMSO
NS                    20
DSH                   2
SWH                   6009.615 Hz
FIDRES                0.091689 Hz
AQ                    5.4525952 sec
RG                     33.22
DE                     83.200 usec
DW                     6.50 usec
TE                    298.9 K
D1                    1.00000000 sec
TD0                   1

===== CHANNEL f1 =====
SFO1                 300.811876 MHz
NUC1                  1H
P1                    15.00 usec
PLW1                  6.40000010 W

F2 - Processing parameters
SI                     65536
SF                    300.8100000 MHz
WDW                    EM
SSB                     0
LB                     0
GB                     0
PC                     1.00

```

23

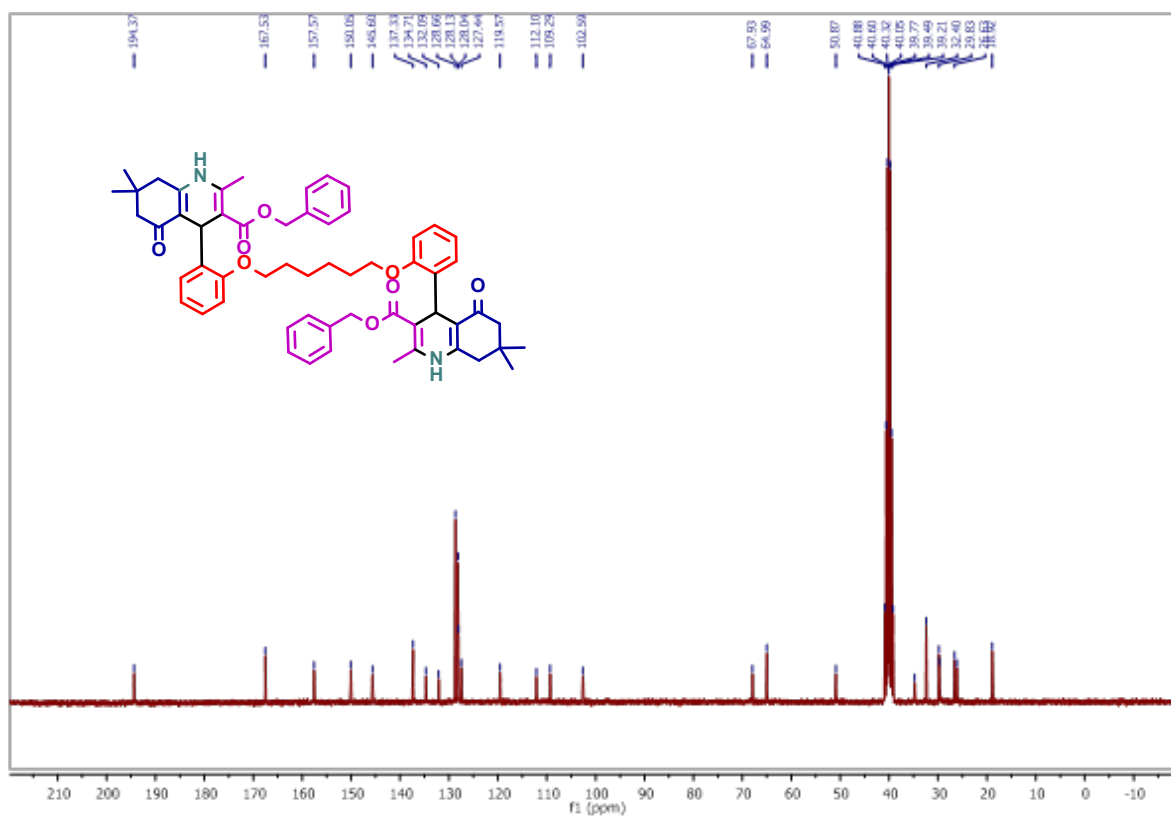

**Figure S24.**  $^{13}\text{C}$ -NMR Spectra of dibenzyl 4,4'-((hexane-1,6-diylbis(oxy))bis(2,1-phenylene))bis(2,7,7-trimethyl-5-oxo-1,4,5,6,7,8-hexahydroquinoline-3-carboxylate) (Table 3, Entry 24)
